1 **Sex-specific effects of aging on the humoral immune response to repeat vaccination with the**  
2 **high-dose seasonal influenza vaccine in older adults**

3  
4 Janna R. Shapiro<sup>1</sup>, Huifen Li<sup>2</sup>, Rosemary Morgan<sup>1</sup>, Yiyin Chen<sup>3</sup>, Helen Kuo<sup>1</sup>, Xiaoxuan Ning<sup>4</sup>,  
5 Patrick Shea<sup>5</sup>, Cunjin Wu<sup>6</sup>, Katherine Merport<sup>7</sup>, Rayna Saldanha<sup>7</sup>, Suifeng Liu<sup>8</sup>, Engle Abrams<sup>2</sup>,  
6 Yan Chen<sup>9</sup>, Denise C. Kelly<sup>2</sup>, Eileen Sheridan-Malone<sup>2</sup>, Lan Wang<sup>10</sup>, Scott L. Zeger<sup>11</sup>, Sabra L.  
7 Klein<sup>1,5\*</sup>, and Sean X. Leng<sup>2,5\*</sup>  
8

9 <sup>1</sup> Department of International Health, Johns Hopkins Bloomberg School of Public Health,  
10 Baltimore, MD, USA.

11 <sup>2</sup> Division of Geriatric Medicine and Gerontology, Department of Medicine, Johns Hopkins  
12 University School of Medicine, Baltimore, MD, USA.

13 <sup>3</sup> Guangdong Geriatrics Institute, Guangdong Provincial People's Hospital, Guangdong Academy  
14 of Medical Sciences, Guangzhou, Guangdong, China.

15 <sup>4</sup> Department of Geriatrics, Xijing Hospital, The Fourth Military Medical University, Xi'an,  
16 Shaanxi, China.

17 <sup>5</sup> W. Harry Feinstone Department of Molecular Microbiology and Immunology, Johns Hopkins  
18 Bloomberg School of Public Health, Baltimore, MD, USA.

19 <sup>6</sup> Department of Geriatrics, The Second Hospital of Tianjin Medical University, Tianjin, Hebei,  
20 China.

21 <sup>7</sup> Zanvyl Krieger School of Arts and Science, Johns Hopkins University, Baltimore, MD, USA.

22 <sup>8</sup> Zhongshan Hospital, Xiamen University, Xiamen, Fujian, China.

23 <sup>9</sup> Department of Geriatrics, The First Affiliated Hospital of Chongqing Medical University,  
24 Chongqing, Sichuan, China.

25 <sup>10</sup> Department of Geriatrics, The First Affiliated Hospital, Zhejiang University School of Medicine,  
26 Hangzhou, Zhejiang, China

27 <sup>11</sup> Department of Biostatistics, Johns Hopkins Bloomberg School of Public Health, Baltimore,  
28 MD, USA.

29 \* Corresponding authors  
30

31 **Running title:** Age, sex, and humoral immunity to influenza

32 **Key words:** age, sex difference, HAI antibody titer, influenza vaccination

33 **Manuscript statistics:**

34 Abstract: 172 words

35 Main text: 4,818 words

36 Figure: 5

37 Tables: 4

38 References: 70  
39

40 **Contact information:** Address correspondence to Sabra Klein ([sklein2@jhu.edu](mailto:sklein2@jhu.edu)) or Sean Leng  
41 ([sleng1@jhmi.edu](mailto:sleng1@jhmi.edu))  
42

43 **Abstract**

44 Older adults ( $\geq 65$  years of age) bear a significant burden of severe disease and mortality  
45 associated with influenza, despite relatively high annual vaccination coverage and substantial  
46 pre-existing immunity to influenza. To test the hypothesis that host factors, including age and  
47 sex, play a role in determining the effect of repeat vaccination and levels of pre-existing  
48 humoral immunity to influenza, we evaluated pre- and post-vaccination strain-specific  
49 hemagglutination inhibition (HAI) titers in adults over 75 years of age who received a high-dose  
50 influenza vaccine in at least four out of six influenza seasons (NCT02200276). Neither age, sex,  
51 body mass index, frailty, nor repeat vaccination were significantly associated with post-  
52 vaccination HAI titer outcomes. Pre-vaccination titers, however, were significantly predictive of  
53 post-vaccination outcomes. Pre-vaccination titers to H1N1 remained constant with age, while  
54 those to H3N2 and influenza B decreased substantially with age in males but not in females.  
55 Our findings highlight the importance of pre-existing immunity in this highly vaccinated older  
56 adult population and suggest that older males are particularly vulnerable to reduced pre-  
57 existing humoral immunity to influenza from previous annual vaccination.

58 **Introduction**

59           Seasonal influenza is an important public health burden in older adults (people  $\geq 65$   
60 years of age), particularly the oldest and frail subset<sup>1-3</sup>. In the United States (U.S.), there are an  
61 estimated 4 million incident cases per year in older adults, accounting for 90% of deaths  
62 associated with influenza<sup>4,5</sup>. The U.S. Centers for Disease Control and Prevention (CDC)  
63 recommends annual influenza vaccination for prevention of influenza infection and  
64 complications in people 6 months and older<sup>6</sup>. The high-dose inactivated influenza vaccine (HD-  
65 IIV) is available to older adults and has demonstrated superior efficacy over standard-dose  
66 vaccines in this vulnerable age group<sup>6,7</sup>. Seasonal influenza vaccine coverage is relatively high in  
67 older adults, with  $>60\%$  of older Americans vaccinated annually, compared to  $<40\%$  of the 18-  
68 49 age group<sup>8</sup>.

69           Age-related immunosenescence, defined by a decline in cellular and humoral immune  
70 function combined with a chronic low-grade inflammatory phenotype (CLIP)<sup>9-11</sup>, is believed to  
71 be the primary reason for the reduced effectiveness of influenza vaccines observed in older  
72 adults<sup>12-14</sup>. Repeated annual vaccination may also have a negative effect on vaccine-induced  
73 humoral immune responses as well as vaccine effectiveness (VE). For example, a recent  
74 observational test-negative study using ten years of vaccination history found that in older  
75 adults, VE decreased with increasing numbers of previous vaccinations but that vaccination  
76 continued to offer some level of protection<sup>15</sup>. Another study over eight seasons in the general  
77 adult population found that VE to H3N2, but not influenza B, was reduced among individuals  
78 with frequent vaccination history compared to those without prior vaccination<sup>16</sup>. The impact of  
79 repeat vaccination on H3N2 was confirmed by a meta-analysis, which found heterogeneous

80 effects of repeat vaccination overall; however, when negative effects were observed, they were  
81 most pronounced for H3N2<sup>17</sup>. In contrast, a recent systematic review and meta-analysis  
82 concluded that the available evidence does not support a reduction in VE with consecutive  
83 repeat vaccination, but that certainty in the evidence was low<sup>18</sup>. Case control studies in both  
84 Australia and Spain found beneficial effects of repeated annual vaccination on VE in older  
85 adults<sup>19,20</sup>, and an observational population-based study in Sweden found no differences in VE  
86 between those who had been vaccinated in the current season only and those who had been  
87 vaccinated in both the current and previous seasons<sup>21</sup>. Based on the conflicting evidence,  
88 multi-season clinical studies to address the effects of aging and repeated vaccination have been  
89 recommended<sup>17</sup>.

90         Mechanistically, pre-existing immunity generated to various influenza virus exposures  
91 over time can have an important impact on the outcome of vaccination. According to immune  
92 imprinting theory, the memory response established by an individual's first influenza exposure  
93 has a lifelong effect on subsequent immune responses to infection or vaccination<sup>22</sup>. Broad pre-  
94 existing immunity is thought to have negative consequences, as pre-existing antibodies can  
95 suppress the response to novel influenza virus strains by reducing the amount of available  
96 antigen or epitope masking<sup>23,24</sup>. A theoretical benefit of HD-IIV is that pre-existing antibodies  
97 cannot sequester the increased amount of antigen delivered, and, thus, more antigen is  
98 available to activate memory B cells and elicit a protective response<sup>25-27</sup>. To our knowledge,  
99 however, the impact of pre-existing immunity in the context of the HD-IIV has not been  
100 adequately characterized.

101 In addition to age, other host factors including sex, frailty, and body mass index (BMI)  
102 can impact vaccine responses in older adults. Females have been found to mount greater  
103 antibody responses to HD-IIV than males<sup>28</sup>. The relationship between frailty and influenza  
104 vaccine responses is debated in the literature, with one study reporting frailty having a negative  
105 effect<sup>29</sup>, others reporting no effect<sup>30-34</sup>, and others still reporting a positive effect<sup>35</sup>. Finally, in  
106 older adults, obesity is significantly associated with decreased hemagglutination inhibition (HAI)  
107 titers and percentage of switched memory B cells<sup>36</sup>. We hypothesize that the variation across  
108 studies in estimates of the effects of pre-existing immunity and repeat annual vaccination is  
109 partly caused by failure to adequately account for heterogeneity and interactions among host  
110 factors that likely differ across studies. To address this knowledge gap, we used a longitudinal  
111 cohort of older adults over 75 years of age who had received high-dose, trivalent inactivated  
112 influenza vaccine (HD-IIV3) in at least four out of six influenza seasons to estimate the impact of  
113 repeat vaccination on the antibody response to HD-IIV3 and its dependence on the intersection  
114 of age, sex, frailty, BMI, pre-existing immunity.

115

## 116 **Results**

### 117 **Study Participants and annual influenza immunization with HD-IIV3**

118 Over the six influenza seasons from 2014-2015 to 2019-2020, 90 individuals participated  
119 in at least four study seasons and 433 doses of HD-IIV3 were. The strains included in each  
120 vaccine and the study protocol are described in **Figure 1. Table 1** shows demographic and  
121 clinical characteristics of the study participants. There was a slight predominance of females  
122 (55.6%), and yearly study enrollment increased over time. Baseline characteristics, measured

123 during the first year of participation, were similar between males and females. The median age  
124 at study enrollment was 80, and >50% of participants were classified as pre-frail as per the  
125 Frailty Phenotype<sup>37</sup>. Trends in the change in frailty since baseline, calculated as the difference  
126 between the first and last years of participation, differed by sex. A greater proportion of males  
127 improved in frailty status, whereas more females either did not change or progressed in frailty  
128 status. A greater proportion of males also experienced changes in BMI over the course of the  
129 study, while BMI did not change for females.

130

131 **Pre- and post-vaccination strain-specific HAI titers are high among repeatedly vaccinated**  
132 **older adults**

133 Pre- and post-vaccination strain-specific HAI titer outcomes to the three HD-IIV3 vaccine  
134 antigens are summarized and disaggregated by sex in **Table 2**. As expected in this highly  
135 vaccinated elderly population, titers and seroprotection rates (defined as an HAI titer  $\geq 40$ <sup>38-40</sup>)  
136 were high. This was particularly true for influenza B, where 98% of the participants were  
137 seroprotected prior to immunization. Post-vaccination, >94% of participants achieved  
138 seroprotection for H1N1 and H3N2, while 100% of participants were seroprotected against  
139 influenza B. Because of the lack of variability in post-vaccination seroprotection, this outcome  
140 was omitted from further analysis. Fold-rise in titers and rates of seroconversion, as defined by  
141  $\geq 4$ -fold titer increase<sup>41</sup>, were relatively low but were highest for H3N2. There were no sex  
142 differences in any post-vaccination outcomes. Together, these data indicate that pre-existing  
143 and post-vaccination strain-specific HAI titers remained high among older adults who were  
144 repeatedly vaccinated with HD-IIV3.

145

146 **Age, sex, BMI, frailty status and repeat vaccination are not associated with post-vaccination**  
147 **outcomes**

148 We then assessed the relationships between pre-defined host factors (i.e., age, sex,  
149 BMI, and frailty status) and post-vaccination strain-specific HAI titer outcomes. When  
150 controlling for pre-vaccination titers and study year, neither age, frailty, nor BMI were  
151 individually statistically-significantly associated with post-vaccine titers (**Figure 2A-C**), the fold-  
152 rise in titers (**Figure 2D-F**), or the odds of seroconversion (**Figure 2G-I**) for either H1N1, H3N2 or  
153 influenza B. Inclusion of interaction terms in the models allowed for analysis of sex-specific  
154 contributions of age, frailty, and BMI as well as sex differences in the effects of these host  
155 factors. None of the host factors had a statistically significant association with post-vaccination  
156 outcomes for either males or females, and no statistically significant sex differences in post-  
157 vaccination outcomes were observed.

158 The relationship between the number of years of study participation and post-  
159 vaccination HAI titers outcomes was investigated to address the concern of potential negative  
160 effects of repeated annual vaccination on the humoral immune response to future vaccines.  
161 Vaccination status prior to study enrollment could not be verified, but leveraging the  
162 longitudinal design of our study, we sought to quantify whether post-vaccination outcomes  
163 declined with additional annual vaccination, and whether this effect differed by sex. There was  
164 generally a negative trend between the number of years participated and post-vaccination  
165 titers (**Figure 3A-D**), fold rise in titers (**Figure 3E-H**), and odds of seroconversion (**Figure 3I-L**);  
166 these decreases, however, were not statistically significant.

167 Two interesting trends emerged from this analysis. First, the effect sizes were smaller  
168 (i.e., closer to the null) for influenza B than for either H1N1 or H3N2, suggesting that the impact  
169 of repeat vaccination may vary by influenza subtype. Secondly, there was a significant sex  
170 difference in the effect of increasing years of vaccination on the odds of seroconverting to  
171 H3N2 (difference in log odds = 0.38;  $p = 0.023$ ). While there was no effect in females (OR =  
172 0.988;  $p = 0.959$ ), the odds of seroconverting to H3N2 decreased by 33% for each additional  
173 year of study participation for males (OR = 0.673;  $p = 0.100$ ) (**Figure 3K-L**). Therefore, in  
174 addition to varying by virus subtype, the mechanisms through which repeated vaccination  
175 affects antibody responses may be sex-specific.

176

#### 177 **Pre-vaccination HAI titers strongly predict post-vaccination outcomes**

178 Overall, host factors and increasing years of vaccination did not significantly predict any  
179 of the post-vaccination antibody titer parameters. Pre-vaccination titers, however, were strong  
180 predictors of post-vaccination titers for H1N1 (slope = 0.49; 95% CI: 0.41; 0.58) (**Figure 4A**),  
181 H3N2 (slope = 0.59; 95% CI: 0.52; 0.66) (**Figure 4B**), and influenza B (slope = 0.57; 95% CI: 0.50;  
182 0.63) (**Figure 4C**) ( $p < 0.0001$  for testing the null hypotheses that the slope is zero for each  
183 antigen). Conversely, there was a strong negative association between pre-vaccination titers  
184 and the fold-rise for H1N1 (slope = -0.15; 95% CI: 0.18; 0.13) (**Figure 4D**), H3N2 (slope = -0.12;  
185 95% CI: -0.15; -0.10) (**Figure 4E**), and influenza B (slope = -0.13; 95% CI: -0.15; -0.11) (**Figure 4F**)  
186 ( $p < 0.0001$  for testing the null hypotheses that the slope to zero for all antigens), such that  
187 greater pre-vaccination titers were associated with a smaller fold rise. Finally, there was a  
188 similar negative association between pre-vaccination titers and the odds of seroconverting for



189 H1N1 (OR = 0.31; 95% CI: 0.21; 0.46) (**Figure 4G**), H3N2 (OR = 0.60; 95% CI: 0.50; 0.71) (**Figure**  
190 **4H**), and influenza B (OR = 0.41; 95% CI: 0.31; 0.55) (**Figure 4I**) ( $p < 0.0001$  for testing the null  
191 hypothesis that the odds ratio is equal to one for all antigens).

192 The strength of these associations suggests that post-vaccination outcomes are  
193 primarily determined by pre-existing humoral immunity. Thus, in highly vaccinated populations,  
194 such as the older adult participants in this study, pre-vaccination titers are not just confounders  
195 to be controlled for in the analysis of post-vaccination humoral immunity but are an outcome of  
196 public health importance that illustrate durability of immunity to influenza from one season to  
197 the next. Given the importance of pre-vaccination titers, we focused subsequent analyses on  
198 exploring the relationships between host factors and pre-vaccination HAI titers in the context of  
199 repeat annual vaccination.

200

#### 201 **Sex modifies the relationship between age and pre-vaccination HAI titers**

202 Next, we assessed the relationships between age, frailty, BMI, and pre-vaccination titers  
203 (**Figure 5A-C**). Neither frailty nor BMI were statistically significantly associated with pre-  
204 vaccination HAI titers for all participants or in sex-disaggregated subgroup analysis. Further,  
205 there were no statistically significant sex differences in the effects of frailty or BMI on pre-  
206 vaccination HAI titers against either H1N1, H3N2, or influenza B. A statistically significant sex by  
207 age interaction, however, was observed for H3N2 (**Figure 5B**) and for influenza B (**Figure 5C**), in  
208 which HAI titers declined with age among male but not female participants.

209 To further interrogate the sex-specific effects of aging, expanded models controlling for  
210 frailty and BMI, in addition to study year, were constructed. Coefficients from the base (i.e.,

211 controlling for study year only) and expanded models are shown in **Table 3**, and results from  
212 expanded models are plotted in **Figure 5D-F**. For H1N1, HAI titers tended to increase with age  
213 for both males and females, but the increase was not statistically significant (males: 0.49 units  
214 per decade,  $p = 0.152$ ; females: 0.35 units per decade,  $p = 0.267$ ), nor was the sex difference in  
215 slope ( $p = 0.676$ ) (**Figure 5D**). For H3N2, while titers again tended to increase with age in  
216 females (0.62 units per decade,  $p = 0.121$ ), there was a decreasing trend with age in males (-  
217 0.75 units per decade,  $p = 0.097$ ), leading to a significant sex difference in age slopes (sex by age  
218 interaction = 0.137;  $p = 0.010$ ) (**Figure 5E**). For influenza B, titers again tended to increase with  
219 age in females (0.33 units per decade,  $p = 0.275$ ) but decreased by 0.78 units per decade in  
220 males ( $p = 0.023$ ) (**Figure 5F**). Like H3N2, the sex difference in the effect of age was significant  
221 for influenza B ( $p = 0.005$ ).

222 Both the base and expanded models were then amended to include cubic splines to  
223 obtain more granular estimates of the effects of age on HAI titers for males and females.  
224 Coefficients for both base and expanded non-linear models are shown in **Table 3**, and results  
225 from expanded models are plotted in **Figure 5G-I**. The non-linear model for H1N1 did not differ  
226 from the linear model, and no significant effects of age within each sex or difference between  
227 the sexes were observed (**Figure 5G**). Although the trends in the linear models were similar for  
228 H3N2 and influenza B, using age as a non-linear predictor revealed that different age categories  
229 were driving the overall effects. For H3N2, the increase in pre-vaccination HAI titers with age in  
230 females was driven by individuals in the 80-85 age category (increase of 0.67 units;  $p = 0.037$ ),  
231 and the decrease in males was driven primarily by people in the 75-80 age category (decrease  
232 of 1.78 units;  $p = 0.012$ ) (**Figure 5.H**). Thus, the sex difference was greatest at the younger end

233 of the cohort ( $p = 0.036$  at 75 years of age). Conversely, increasing titers to influenza B with age  
234 in females were driven by individuals in the 75-80 age category (increase of 1.2 units;  $p =$   
235 0.004), whereas for males there was a sharp decline in HAI titers that occurred in participants  
236 90-95 years of age (decrease of 1.65 units;  $p < 0.0001$ ) (**Figure 5.I**). Here, the sex difference in  
237 pre-vaccination titers was only significant at the oldest end of the cohort ( $p = 0.003$  at 95 years  
238 of age). Taken together, these data illustrate sex-specific effects of aging on pre-vaccination  
239 antibody titers to H3N2 and influenza B, but not H1N1.

240

#### 241 **Controlling for sex leads to incorrect interpretations**

242 The impact of sex as a biological variable is often ignored in biomedical research<sup>42,43</sup>.  
243 This is particularly true in the context of aging, where attention is typically directed to  
244 immunosenescence, failing to recognize that aging can have distinct effects on immune  
245 function in males and females<sup>44-46</sup>. In this analysis, *a priori* hypotheses regarding sex differences  
246 in the effect of age guided the inclusion of age by sex interaction terms in all models. To  
247 illustrate the consequences of ignoring sex as a biological variable, however, analyses were  
248 repeated controlling for sex rather than allowing age effects to vary by sex. For H3N2 and  
249 influenza B, where the effect of aging was found to be statistically significantly different in  
250 males as compared to females, the estimates derived by controlling for sex (black lines in **Figure**  
251 **5E, F, H, I**) were not representative of either sex. In the linear models, for example, controlling  
252 for sex led to the incorrect inference that titers remain constant with age, while the interaction  
253 models demonstrate that this is false for both males and females.

254 In addition to conceptual reasons to interrogate sex differences, inclusion of interaction  
255 terms improved the goodness-of-fit of statistical models. Goodness-of-fit of eight models for  
256 each vaccine antigen were compared using Akaike's Information Criterion (AIC) in **Table 4**,  
257 where lower values indicate better relative goodness-of-fit. For antibody titers to H3N2 and  
258 influenza B, despite the penalty for increasing model complexity, fit was improved by including  
259 an age-sex interaction term, and the best models overall were expanded models that allowed  
260 the effect of age to differ by sex. Thus, incorporating sex differences into vaccinology research  
261 can lead to more robust analysis.

262  
263 **Discussion**

264 In this multi-season, longitudinal study of older adults over 75 years of age, we observed  
265 no statistically significant associations of age, sex, BMI, frailty, or the number of years of repeat  
266 annual vaccination with any post-vaccination HAI titer outcomes. Importantly, this suggests  
267 that repeat annual vaccination with HD-IIV3 does not seem to have significant positive or  
268 negative effects on strain-specific HAI antibody responses in the highly vaccinated elderly  
269 population but may mask the impact of other factors. Interestingly, there was some evidence to  
270 suggest that particularly for H3N2, the effect of repeat vaccination does vary by sex, thus  
271 supporting our hypothesis that variability in estimates of the effect of repeat vaccination in the  
272 literature is caused by failure to adequately account for the contribution of host factors.

273 Pre-vaccination titers strongly predicted all post-vaccination antibody titer outcomes,  
274 indicating that pre-existing humoral immunity, which may reflect the durability of humoral  
275 immunity against influenza from previous seasons, is an important outcome measure to  
276 consider in the highly vaccinated older adult population. Regarding age as a determinant of pre-

277 existing humoral immunity, we found that HAI titers to all three vaccine antigens stayed  
278 constant in females with age but that HAI titers to H3N2 and influenza B decreased with age in  
279 males, leading to significant sex differences in the effect of age for these two viruses. It has  
280 previously been reported that at older ages, there is a male-bias in influenza B infection and  
281 hospitalization<sup>47,48</sup>. Our results thus provide a potential mechanism for this sex difference and  
282 highlight the need to develop better vaccines or vaccination strategies for older males. Finally,  
283 we demonstrated that failing to allow for sex-specific effects would have resulted in invalid  
284 conclusions for both males and females.

285         Because older adults are disproportionately burdened by severe disease and mortality  
286 from seasonal influenza, significant effort has been devoted to improving annual vaccination  
287 coverage for this vulnerable population. Older adults, particularly those who are over 75 years  
288 of age, can thus have decades of repeated annual influenza vaccination. Cumulatively, repeated  
289 annual vaccination can lead to high pre-vaccination titers. As expected, over 72% participants  
290 had a pre-vaccination HAI titer of 40 or higher to H1N1 and H3N2, and 98% participants had  
291 such “seroprotection” to influenza B. High pre-existing humoral immunity has important  
292 consequences in assessing humoral immune responses to influenza vaccines, as demonstrated  
293 by the strong positive relationship between pre- and post-vaccination titers. Conversely, ratio-  
294 based outcomes (i.e., fold rise and seroconversion) were negatively associated with pre-  
295 vaccination titers, since, by definition, large denominators (pre-vaccination titers) result in  
296 smaller ratios. We recently reported a similar effect in younger adult healthcare workers, where  
297 mandatory vaccination policies result in exceptionally high rates of immunization<sup>49</sup>. While some  
298 argue that high levels of pre-existing antibodies interfere with the generation of *de novo*

299 immune responses<sup>24,27</sup>, others suggest that ratio-based measures simply do not appropriately  
300 control for imbalances in levels of pre-existing humoral immunity<sup>50</sup>. Following the latter  
301 interpretation, a “ceiling effect” is evident in our data, whereby the limit of detection of the  
302 assay prohibits observing seroconversion or a large fold-rise in individuals with high levels of  
303 pre-existing humoral immunity. Particularly important in older adults, where formation of *de*  
304 *novo* responses is impaired by immunosenescence<sup>51</sup>, the breadth of pre-existing humoral  
305 immunity and the positive predictive value for post-vaccination titers can thus be harnessed to  
306 elicit protection<sup>26</sup>. The clinical and scientific implications of this notion are far-reaching and  
307 long-term, as the Advisory Committee on Immunization Practices (ACIP) of the CDC has  
308 recommended annual influenza vaccination for anyone aged 6 months and older since 2010<sup>52</sup>.

309         For many vaccines, antibody titers wane over time<sup>53-56</sup>. Influenza vaccines are unique in  
310 this respect due to the recommendation for yearly immunization and exceptional antigenic  
311 diversity, which alter the dynamics of waning immunity. The constant pre-vaccination HAI titers  
312 with age in females seen in our study suggest that females benefit from a booster effect from  
313 each successive annual vaccination that appears to prevent antibody waning. This influenza-  
314 specific effect has been reported elsewhere, where samples collected from individuals over a  
315 20-year period revealed longitudinal increases in neutralizing titers to influenza<sup>57</sup>. As an  
316 explanation for their findings, the authors suggest that even as viral antigens drift over time,  
317 many epitopes remain conserved. These conserved epitopes stimulate memory B cells that  
318 were generated in response to previous exposures, thus periodically boosting steady-state  
319 immunity<sup>57</sup>. However, our data suggest that this effect is absent in males for H3N2 and  
320 influenza B. The reasons for this sex difference are unknown, but may be attributable to the

321 compounding effects of females developing stronger responses to influenza infection and  
322 vaccination throughout adulthood<sup>58</sup>, leading to a more robust repertoire of memory B cells that  
323 recognize conserved epitopes on drifted virus strains. It is speculated that in older adults,  
324 consistently inferior responses among males may manifest as a lack of memory B cells that can  
325 be boosted by drifted viruses to counteract waning of antibody over time, thus resulting in  
326 decreasing pre-vaccination titers with age.

327         Notably the sex difference was absent for H1N1. A possible explanation for this lies in  
328 the differing evolutionary rates of the three viral strains. H1N1 experiences slower evolution  
329 than H3N2<sup>59</sup> and the influenza B/Victoria lineage<sup>60</sup>. In addition, the global co-circulation of  
330 B/Yamagata and B/Victoria lineages leads to increased exposure to divergent antigens<sup>61</sup>.  
331 Accordingly, over the six influenza seasons included in our study, vaccine antigens were  
332 significantly more variable for H3N2 and influenza B than for H1N1. While three H1N1 strains  
333 were included in seasonal vaccines, five H3N2 strains and four influenza B strains were included  
334 over the six study years. A decade-long review of the number of divergent vaccine strains that  
335 our study participants may have been exposed to indicates that since 2010, the number of  
336 H1N1 vaccine strains remained at a total of three, while seven H3N2 strains and five influenza B  
337 were used in trivalent vaccines over this period<sup>62</sup>. It is thus possible that repeated exposure to  
338 the same H1N1 antigen sufficiently boosted male steady-state immunity to mask sex  
339 differences in the immune response. Conversely, for H3N2 and influenza B, sequential exposure  
340 to drifted virus strains required robust and broad responses to allow for boosting of steady-  
341 state immunity, which may have only been present in females.

342 Another possible explanation is immunological imprinting in youth, as it has a lifelong  
343 impact on subsequent immune responses to influenza infection and vaccination<sup>22,63</sup>. Individuals  
344 in our cohort, born from 1916-1941, may have been exposed to H1N1 in their youth, while the  
345 1918 pandemic virus continued to circulate, but were likely exposed to H3N2 and influenza B  
346 later in life<sup>64</sup>. Accordingly, older adults are more likely to have HAI activity against historical  
347 strains of H1N1 viruses than younger subjects, but also have more restricted reactivity to  
348 historical H3N2 viruses<sup>65</sup>. Older cohorts are also relatively protected against symptomatic H1N1  
349 infection compared to younger cohorts, but this pattern is reversed for H3N2<sup>66,67</sup>. It is therefore  
350 possible that strong immune imprinting to H1N1 virus strains masked the sex differences  
351 otherwise observed for H3N2 and influenza B.

352 Our study had several strengths and limitations. First, this was an observational study  
353 that was not specifically designed to interrogate sex differences in the immune response to  
354 influenza vaccination. To overcome small yearly sample sizes, six influenza seasons were pooled  
355 together, and statistical methods were used to control for annual variation in vaccine viruses  
356 and repeated measurements on participants. The resulting multi-season nature of this work  
357 improves generalizability to future influenza seasons. Secondly, the humoral immune response  
358 to vaccination was solely based on strain-specific HAI titers, which are the standard in the field,  
359 but lack the functional quality of microneutralization assays<sup>68</sup>. Relying solely on serological  
360 samples also prohibited more in-depth mechanistic investigation at the cellular level. Third, the  
361 lack of racial diversity in our cohort must be noted, as it prohibited us from investigating race as  
362 a host factor of interest, which should be considered in future studies. Although the study  
363 lacked racial diversity, the cohort was diverse in terms of age at vaccination, allowing us to



364 study effects in the ‘oldest’ old subset. Finally, a major strength of this study is the  
365 intersectional approach to this analysis, which allowed for interrogation of effects both  
366 between and within groups (i.e., between and among males and females), leading to a richer  
367 and more nuanced interpretation<sup>69</sup>.

368 In conclusion, we demonstrated that in highly vaccinated older adults, pre-vaccination  
369 HAI titers, rather than age, sex, BMI, frailty, or repeat vaccination, predict post-vaccination  
370 parameters of humoral immunity. Further, these pre-vaccination titers change with age in a  
371 sex-specific manner such that older males are particularly vulnerable to lower levels of pre-  
372 existing humoral immunity. Further research should focus on elucidating the mechanisms  
373 underlying this sex difference, as well as novel vaccination strategies to harness the breadth of  
374 pre-existing immunity in older adults and better protect this vulnerable population.

375

## 376 **Methods**

### 377 **Study population and protocol**

378 During the 2014-2015 to 2019-2020 influenza seasons, we enrolled community-dwelling  
379 older adults above 75 years of age who had not yet received a seasonal influenza vaccine.  
380 Individuals who had a history of allergic reaction to influenza vaccines or to eggs, were  
381 currently taking oral steroids or had worsening or new-onset of immune-modulating conditions  
382 were excluded. Study participants came to the Clinical Research Unit at Johns Hopkins Institute  
383 of Clinical and Translational Research on the Johns Hopkins Bayview Medical Center campus, or  
384 study visits were done at participants’ home as needed. A detailed medical history was  
385 obtained, vital signs were measured and frailty was assessed as per the Frailty Phenotype<sup>37</sup>.

386 After a pre-vaccination blood draw, participants received HD-IIV3 (Fluzone® High-Dose Sanofi  
387 Pasteur, PA, USA). A second blood sample was collected 21 to 28 days after vaccine  
388 administration (**Figure 1**). To focus on the context of repeat annual vaccination, only individuals  
389 who participated for a minimum of 4 study years were included in this analysis.

390

### 391 **Ethics**

392 Written, informed consent was obtained from all participants. The study protocol was  
393 approved by the Johns Hopkins School of Medicine Institutional Review Board. The study is  
394 registered on [clinicaltrials.gov](https://clinicaltrials.gov) (NCT02200276).

395

### 396 **Hemagglutination inhibition assays**

397 A validated HAI assay was used to quantify antibody titers against study vaccine  
398 antigens for the three vaccine strains (H1N1, H3N2 and B) in each year and were performed by  
399 Sanofi Pasteur as previously described<sup>70</sup>. Briefly, serum was incubated with type III  
400 neuraminidase to eliminate non-specific inhibitors and then with turkey red blood cells to  
401 adsorb non-specific agglutinins. Sera were then serially diluted in duplicate, beginning at a 1:10  
402 dilution, and incubated with influenza virus (4 hemagglutination units/25µl). Turkey red blood  
403 cells were then added, and the titer defined as the highest dilution in which hemagglutination  
404 was inhibited.

405

### 406 **Definitions and categorization of predictor variables**

407 Sex was used as a dichotomous variable based on self-report. Age was calculated based  
408 on the date of vaccination and used as a continuous variable. The frailty assessment was based  
409 on the presence or absence of five measurable characteristics: slowed motor performance (by  
410 walking speed), poor endurance and energy (by self-report of exhaustion), weakness (by grip  
411 strength), shrinking (by unintentional weight loss), and low physical activity (self-report)<sup>29,37</sup>.  
412 Participants with three or more out of these five characteristics were defined as frail, those  
413 with one or two as prefrail, and those with none as non-frail. BMI was calculated based on  
414 measured height and weight and used as a continuous variable. Study year refers to the  
415 influenza season (i.e., 2014-2015 to 2019-2020) and was used as categorical variable so as not  
416 to imply a linear relationship from year-to-year. Number of years of study participation was  
417 defined as the number of vaccines administered to an individual as part of the study and was  
418 used as a continuous variable ranging from 1 to 6.

419

#### 420 **Outcome variables**

421 Geometric mean titers were calculated both pre- and post-vaccination. For regression  
422 analysis, titers were transformed to a  $\log_2$  scale to achieve an approximately normal  
423 distribution. The fold-rise in titer was calculated as post-vaccination titers divided by pre-  
424 vaccination titers, and  $\log_{10}$  transformed to achieve a normal distribution. Seroconversion was  
425 defined as achieving a fold-rise  $\geq 4$  and used as a binary outcome. Seroprotection was defined as  
426 a titer  $\geq 1:40$  and used as a binary outcome.

427

428

429 **Statistical analysis**

430 To account for repeated measures on participants, multi-level mixed effects models  
431 with random intercepts on the individual were used. Following standard risk factor analysis  
432 procedure, the contributions of host factors of interest were first assessed individually. Based  
433 on the *a priori* hypotheses of this analysis, fixed effects of the base models for post-vaccination  
434 outcomes adjusted for study year, pre-vaccination titers and included interaction terms to  
435 allow the effect of the host factor to differ for males and females. Fixed effects of the base  
436 models for pre-vaccination titers adjusted for study year and included interaction terms to  
437 allow effects to differ by sex. Where significant sex differences were found, further analysis  
438 controlled for additional covariates, and used cubic B-splines to investigate non-linear  
439 relationships<sup>71</sup>. The relative goodness-of-fit of various models were compared using Akaike's  
440 Information Criterion. For graphs, predictions were capped at 95 years of age due to low  
441 sample size and large uncertainty in estimates above 95 years. Coefficients were considered  
442 statistically significant if 95% confidence intervals did not span the null value of zero (i.e.,  
443  $p < 0.05$ ). Analysis was performed in Stata 15 (StataCorp).

444

445 **Data Availability**

446 The data that support the findings of this study are available from the corresponding  
447 author upon request.

448

449 **Acknowledgements**

450           The authors thank the participants, as well as the clinical staff at the Healthy Aging  
451 Studies Unit and the Johns Hopkins University Institute for Clinical and Translational Research.  
452 The authors would also like to thank Dr. Andrew Pekosz for helpful discussion and feedback.  
453 Sanofi Pasteur provided HD-IIV3 and performed HAI testing, but remained blinded to the results  
454 and had no further scientific input. This work was supported in part by National Institute of  
455 Health (NIH)/National Institute of Allergy and Infectious Diseases R01 AI108907 to S.X.L.,  
456 NIH/National Institute on Aging Specialized Center of Research Excellence U54 AG062333  
457 awarded to S.L.K., and funding from Irma and Paul Milstein Program for Senior Health, Milstein  
458 Medical Asian American Partnership (MMAAP) Foundation of USA to S.X.L. J.R.S was supported  
459 by a training award from the Fonds de recherche du Québec – Santé (File #287609). C.J.W,  
460 X.X.N, and S.F.L. were supported by Irma and Paul Milstein Program for Senior Health  
461 fellowship awards from MMAAP Foundation of USA ([www.mmaapf.org](http://www.mmaapf.org)).

462

463 **Author contributions**

464 S.X.L. designed and oversaw the study. E.A., D.C.K. and E.S-M collected data and biological  
465 samples. H.F.L., Y.Y.C., Y.C., C.J.W., X.X.N., L.W., and S.F.L. processed biological samples. J.R.S.,  
466 K.M., and R.S. entered and cleaned data. J.R.S. conceived of analytical approach and  
467 experimental questions and performed analyses under mentorship of S.L.Z, R.M., and S.L.K.  
468 K.M., H.K., and P.S. contributed to analyses. J.R.S. wrote the manuscript, with significant  
469 editorial contributions and discussion from S.L.K., R.M., S.L.Z., and S.X.L. All authors reviewed,

470 edited, and approved the final draft of the manuscript. All authors are accountable for the  
471 accuracy and integrity of the work.

472

### 473 **Competing Interests Statement**

474 The authors have no competing interests to declare.

475

### 476 **References**

- 477 1 Macias, A. E. *et al.* The disease burden of influenza beyond respiratory illness. *Vaccine*  
478 (2020).
- 479 2 Iuliano, A. D. *et al.* Estimates of global seasonal influenza-associated respiratory  
480 mortality: a modelling study. *Lancet* **391**, 1285-1300 (2018).
- 481 3 Global Burden of Disease Influenza Collaborators *et al.* Mortality, morbidity, and  
482 hospitalisations due to influenza lower respiratory tract infections, 2017: an analysis for  
483 the Global Burden of Disease Study 2017. *Lancet Respir Medicine* **7**, 69-89,  
484 doi:10.1016/s2213-2600(18)30496-x PMID - 30553848 (2018).
- 485 4 Gnanasekaran, G., Biedenbender, R., Davidson, H. E. & Gravenstein, S. Vaccinations for  
486 the Older Adult. *Clin Geriatr Med* **32**, 609-625, doi:10.1016/j.cger.2016.03.001 PMID -  
487 27394026 (2016).
- 488 5 Hamborsky, J., Kroger, A. & Wolfe, S. *Epidemiology and prevention of vaccine-*  
489 *preventable diseases.* (US Department of Health & Human Services, Centers for Disease  
490 Control and Prevention 2015).
- 491 6 Grohskopf, L. A. *et al.* Prevention and control of seasonal influenza with vaccines:  
492 recommendations of the Advisory Committee on Immunization Practices—United  
493 States, 2020–21 influenza season. *MMWR Recommendations and Reports* **69**, 1 (2020).
- 494 7 DiazGranados, C. A. *et al.* Efficacy of High-Dose versus Standard-Dose Influenza Vaccine  
495 in Older Adults. *New England Journal of Medicine* **371**, 635-645,  
496 doi:10.1056/nejmoa1315727 PMID - 25119609 (2014).
- 497 8 Centers for Disease Control and Prevention. (2020).
- 498 9 Crooke, S. N., Ovsyannikova, I. G., Poland, G. A. & Kennedy, R. B. Immunosenescence: A  
499 systems-level overview of immune cell biology and strategies for improving vaccine  
500 responses. *Exp Gerontol* **124**, 110632, doi:10.1016/j.exger.2019.110632 PMID -  
501 31201918 (2019).
- 502 10 Weinberger, B. Vaccines for the elderly: current use and future challenges. *Immunity &*  
503 *ageing : I & A* **15**, 3, doi:10.1186/s12979-017-0107-2 PMID - 29387135 (2018).
- 504 11 Chen, Y., Liu, S. & Leng, S. X. Chronic low-grade inflammatory phenotype (CLIP) and  
505 senescent immune dysregulation. *Clinical therapeutics* **41**, 400-409 (2019).
- 506 12 Demicheli, V., Jefferson, T., Ferroni, E., Rivetti, A. & Di Pietrantonj, C. Vaccines for  
507 preventing influenza in healthy adults. *Cochrane database of systematic reviews* (2018).

- 508 13 Nichols, M. K. *et al.* Influenza vaccine effectiveness to prevent influenza-related  
509 hospitalizations and serious outcomes in Canadian adults over the 2011/12 through  
510 2013/14 influenza seasons: A pooled analysis from the Canadian Immunization Research  
511 Network (CIRN) Serious Outcomes Surveillance (SOS Network). *Vaccine* **36**, 2166-2175,  
512 doi:10.1016/j.vaccine.2018.02.093 PMID - 29548608 (2018).
- 513 14 Rondy, M. *et al.* Effectiveness of influenza vaccines in preventing severe influenza illness  
514 among adults: a systematic review and meta-analysis of test-negative design case-  
515 control studies. *Journal of Infection* **75**, 381-394 (2017).
- 516 15 Kwong, J. C. *et al.* The impact of repeated vaccination using 10-year vaccination history  
517 on protection against influenza in older adults: a test-negative design study across the  
518 2010/11 to 2015/16 influenza seasons in Ontario, Canada. *Eurosurveillance* **25**, 1900245  
519 (2020).
- 520 16 McLean, H. Q. *et al.* Impact of Repeated Vaccination on Vaccine Effectiveness Against  
521 Influenza A(H3N2) and B During 8 Seasons. *Clin Infect Dis* **59**, 1375-1385,  
522 doi:10.1093/cid/ciu680 PMID - 25270645 (2014).
- 523 17 Belongia, E. A. *et al.* Repeated annual influenza vaccination and vaccine effectiveness:  
524 review of evidence. *Expert Review of Vaccines* **16**, 723-736,  
525 doi:10.1080/14760584.2017.1334554 PMID - 28562111 (2017).
- 526 18 Bartoszko, J. J. *et al.* Does consecutive influenza vaccination reduce protection against  
527 influenza: A systematic review and meta-analysis. *Vaccine* **36**, 3434-3444,  
528 doi:10.1016/j.vaccine.2018.04.049 PMID - 29724509 (2018).
- 529 19 Cheng, A. C. *et al.* Repeated Vaccination Does Not Appear to Impact Upon Influenza  
530 Vaccine Effectiveness Against Hospitalization With Confirmed Influenza. *Clin Infect Dis*  
531 **64**, 1564-1572, doi:10.1093/cid/cix209 PMID - 28329167 (2017).
- 532 20 Casado, I. *et al.* Repeated influenza vaccination for preventing severe and fatal influenza  
533 infection in older adults: a multicentre case–control study. *Canadian Medical*  
534 *Association Journal* **190**, E3-E12, doi:10.1503/cmaj.170910 PMID - 29311098 (2018).
- 535 21 Örtqvist, Å., Brytting, M., Leval, A. & Hergens, M.-P. Impact of repeated influenza  
536 vaccinations in persons over 65 years of age: A large population-based cohort study of  
537 severe influenza over six consecutive seasons, 2011/12–2016/17. *Vaccine* **36**, 5556-  
538 5564, doi:10.1016/j.vaccine.2018.07.052 PMID - 30076104 (2018).
- 539 22 Jang, H. & Ross, T. M. Preexisting influenza specific immunity and vaccine effectiveness.  
540 *Expert Review of Vaccines* **18**, 1-9, doi:10.1080/14760584.2019.1675519 PMID -  
541 31575308 (2019).
- 542 23 Henry, C., Palm, A.-K. E., Krammer, F. & Wilson, P. C. From Original Antigenic Sin to the  
543 Universal Influenza Virus Vaccine. *Trends Immunol* **39**, 70-79,  
544 doi:10.1016/j.it.2017.08.003 PMID - 28867526 (2018).
- 545 24 Linderman, S. L. *et al.* Influenza Immunization in the Context of Preexisting Immunity.  
546 *Csh Perspect Med*, a040964, doi:10.1101/cshperspect.a040964 PMID - 32988981 (2020).
- 547 25 Guthmiller, J. J., Utset, H. A. & Wilson, P. C. B Cell Responses against Influenza Viruses:  
548 Short-Lived Humoral Immunity against a Life-Long Threat. *Viruses* **13**, 965 (2021).
- 549 26 Guthmiller, J. J. & Wilson, P. C. Harnessing immune history to combat influenza viruses.  
550 *Current Opinion in Immunology* **53**, 187-195, doi:10.1016/j.coi.2018.05.010 PMID -  
551 29890370 (2018).

- 552 27 Ellebedy, A. H. Immunizing the Immune: Can We Overcome Influenza's Most Formidable  
553 Challenge? *Nato Adv Sci Inst Se* **6**, 68, doi:10.3390/vaccines6040068 PMID - 30248996  
554 (2018).
- 555 28 Falsey, Ann R., Treanor, John J., Tornieporth, N., Capellan, J. & Gorse, Geoffrey J.  
556 Randomized, Double-Blind Controlled Phase 3 Trial Comparing the Immunogenicity of  
557 High-Dose and Standard-Dose Influenza Vaccine in Adults 65 Years of Age and Older. *J*  
558 *Infect Dis* **200**, 172-180, doi:10.1086/599790 PMID - 19508159 (2009).
- 559 29 Yao, X. *et al.* Frailty is associated with impairment of vaccine-induced antibody response  
560 and increase in post-vaccination influenza infection in community-dwelling older adults.  
561 *Vaccine* **29**, 5015-5021, doi:10.1016/j.vaccine.2011.04.077 PMID - 21565245 (2011).
- 562 30 Narang, V. *et al.* Influenza Vaccine-Induced Antibody Responses Are Not Impaired by  
563 Frailty in the Community-Dwelling Elderly With Natural Influenza Exposure. *Front*  
564 *Immunol* **9**, 2465, doi:10.3389/fimmu.2018.02465 PMID - 30405641 (2018).
- 565 31 Epps, P. V. *et al.* Preexisting Immunity, Not Frailty Phenotype, Predicts Influenza  
566 Postvaccination Titers among Older Veterans. *Clin Vaccine Immunol* **24**, e00498-00416,  
567 doi:10.1128/cvi.00498-16 PMID - 28100496 (2017).
- 568 32 Bauer, J. M. *et al.* Influenza vaccine response in community-dwelling German prefrail  
569 and frail individuals. *Immun Ageing* **14**, 17, doi:10.1186/s12979-017-0098-z PMID -  
570 28694834 (2017).
- 571 33 Moehling, K. K. *et al.* The effect of frailty on HAI response to influenza vaccine among  
572 community-dwelling adults  $\geq$  50 years of age. *Hum Vacc Immunother* **14**, 361-367,  
573 doi:10.1080/21645515.2017.1405883 PMID - 29172948 (2017).
- 574 34 Moehling, K. K. *et al.* The impact of physical frailty on the response to inactivated  
575 influenza vaccine in older adults. *Aging* **12**, doi:10.18632/aging.202207 PMID -  
576 33347425 (2020).
- 577 35 Loeb, N. *et al.* Frailty is associated with increased hemagglutination-inhibition titres in a  
578 4-year randomized trial comparing standard and high dose influenza vaccination. *Open*  
579 *Forum Infect Dis* **7**, ofaa148, doi:10.1093/ofid/ofaa148 PMID - 32500087 (2020).
- 580 36 Frasca, D. *et al.* Obesity decreases B cell responses in young and elderly individuals.  
581 *Obesity* **24**, 615-625, doi:10.1002/oby.21383 PMID - 26857091 (2016).
- 582 37 Fried, L. P. *et al.* Frailty in Older Adults: Evidence for a Phenotype. *Journals Gerontology*  
583 *Ser Biological Sci Medical Sci* **56**, M146-M157, doi:10.1093/gerona/56.3.m146 PMID -  
584 11253156 (2001).
- 585 38 Ward, B. J. *et al.* The establishment of surrogates and correlates of protection: Useful  
586 tools for the licensure of effective influenza vaccines? *Hum Vacc Immunother* **14**, 647-  
587 656, doi:10.1080/21645515.2017.1413518 PMID - 29252098 (2018).
- 588 39 Al-Khayatt, R., Jennings, R. & Potter, C. Interpretation of responses and protective levels  
589 of antibody against attenuated influenza A viruses using single radial haemolysis.  
590 *Epidemiology & Infection* **93**, 301-312 (1984).
- 591 40 Hobson, D., Curry, R., Beare, A. & Ward-Gardner, A. The role of serum  
592 haemagglutination-inhibiting antibody in protection against challenge infection with  
593 influenza A2 and B viruses. *Epidemiology & Infection* **70**, 767-777 (1972).



- 594 41 Reber, A. & Katz, J. Immunological assessment of influenza vaccines and immune  
595 correlates of protection. *Expert Review of Vaccines* **12**, 519-536, doi:10.1586/erv.13.35  
596 PMID - 23659300 (2013).
- 597 42 Shapiro, J. R., Klein, S. L. & Morgan, R. Stop 'controlling' for sex and gender in global  
598 health research. *Bmj Global Heal* **6**, e005714, doi:10.1136/bmjgh-2021-005714 (2021).
- 599 43 Klein, S. L., Jedlicka, A. & Pekosz, A. The Xs and Y of immune responses to viral vaccines.  
600 *Lancet Infect Dis* **10**, 338-349, doi:10.1016/s1473-3099(10)70049-9 PMID - 20417416  
601 (2010).
- 602 44 Klein, S. L. & Gearhart, P. J. Commentary for the 'VSI: Aging and sex in immunity'. *Cell*  
603 *Immunol* **348**, 104037, doi:10.1016/j.cellimm.2019.104037 PMID - 31992440 (2020).
- 604 45 Potluri, T. *et al.* Age-associated changes in the impact of sex steroids on influenza  
605 vaccine responses in males and females. *Npj Vaccines* **4**, 29, doi:10.1038/s41541-019-  
606 0124-6 PMID - 31312529 (2019).
- 607 46 Bupp, M. R. G., Potluri, T., Fink, A. L. & Klein, S. L. The Confluence of Sex Hormones and  
608 Aging on Immunity. *Front Immunol* **9**, 1269, doi:10.3389/fimmu.2018.01269 PMID -  
609 29915601 (2018).
- 610 47 Wong, K. C., Luscombe, G. M. & Hawke, C. Influenza infections in Australia 2009–2015: is  
611 there a combined effect of age and sex on susceptibility to virus subtypes? *BMC*  
612 *Infectious Diseases* **19**, 42, doi:10.1186/s12879-019-3681-4 PMID - 30630435 (2019).
- 613 48 Wang, X.-L. *et al.* Age and Sex Differences in Rates of Influenza-Associated  
614 Hospitalizations in Hong Kong. *Am J Epidemiol* **182**, 335-344, doi:10.1093/aje/kwv068  
615 PMID - 26219977 (2015).
- 616 49 Kuo, H. *et al.* Sex-specific effects of age and body mass index on antibody responses to  
617 seasonal influenza vaccines in healthcare workers. *Vaccine* (2021).
- 618 50 Nauta, J. Statistics in Clinical Vaccine Trials - Adjusting for Imbalance in Pre-Vaccination  
619 State. 57-65, doi:10.1007/978-3-642-14691-6\_5 (2010).
- 620 51 Weinberger, B., Herndler-Brandstetter, D., Schwanninger, A., Weiskopf, D. & Grubeck-  
621 Loebenstein, B. Biology of Immune Responses to Vaccines in Elderly Persons. *Clin Infect*  
622 *Dis* **46**, 1078-1084, doi:10.1086/529197 PMID - 18444828 (2008).
- 623 52 Centers for Disease Control and Prevention. *Influenza Historic Timeline*,  
624 <[https://www.cdc.gov/flu/pandemic-resources/pandemic-timeline-1930-and-](https://www.cdc.gov/flu/pandemic-resources/pandemic-timeline-1930-and-beyond.htm)  
625 [beyond.htm](https://www.cdc.gov/flu/pandemic-resources/pandemic-timeline-1930-and-beyond.htm)> (2019).
- 626 53 Bitzegeio, J., Majowicz, S., Matysiak-Klose, D., Sagebiel, D. & Werber, D. Estimating age-  
627 specific vaccine effectiveness using data from a large measles outbreak in Berlin,  
628 Germany, 2014/15: evidence for waning immunity. *Eurosurveillance* **24**, 1800529 (2019).
- 629 54 Crooke, S. N. *et al.* Durability of humoral immune responses to rubella following MMR  
630 vaccination. *Vaccine* **38**, 8185-8193 (2020).
- 631 55 Savage, R. D. *et al.* A multisite study of pertussis vaccine effectiveness by time since last  
632 vaccine dose from three Canadian provinces: A Canadian Immunization Research  
633 Network study. *Vaccine* **39**, 2772-2779 (2021).
- 634 56 Posuwan, N. *et al.* The success of a universal hepatitis B immunization program as part  
635 of Thailand's EPI after 22 years' implementation. *Plos One* **11**, e0150499 (2016).
- 636 57 Miller, M. S. *et al.* Neutralizing Antibodies Against Previously Encountered Influenza  
637 Virus Strains Increase over Time: A Longitudinal Analysis.

- 638 58 Flanagan, K. L., Fink, A. L., Plebanski, M. & Klein, S. L. Sex and Gender Differences in the  
639 Outcomes of Vaccination over the Life Course. *Annu Rev Cell Dev Bi* **33**, 577-599,  
640 doi:10.1146/annurev-cellbio-100616-060718 PMID - 28992436 (2017).
- 641 59 Liu, M. *et al.* Antigenic patterns and evolution of the human influenza A (H1N1) virus.  
642 *Scientific reports* **5**, 1-8 (2015).
- 643 60 Vijaykrishna, D. *et al.* The contrasting phylodynamics of human influenza B viruses. *Elife*  
644 **4**, e05055 (2015).
- 645 61 Caini, S. *et al.* The epidemiological signature of influenza B virus and its B/Victoria and  
646 B/Yamagata lineages in the 21st century. *Plos One* **14**, e0222381,  
647 doi:10.1371/journal.pone.0222381 PMID - 31513690 (2019).
- 648 62 World Health Organization. *WHO recommendations on the composition of influenza*  
649 *virus vaccines*, <<https://www.who.int/influenza/vaccines/virus/recommendations/en/>>  
650 (2021).
- 651 63 Auladell, M. *et al.* Recalling the Future: Immunological Memory Toward Unpredictable  
652 Influenza Viruses. *Front Immunol* **10**, 1400, doi:10.3389/fimmu.2019.01400 PMID -  
653 31312199 (2019).
- 654 64 Hannoun, C. The evolving history of influenza viruses and influenza vaccines. *Expert*  
655 *review of vaccines* **12**, 1085-1094 (2013).
- 656 65 Nuñez, I. A. *et al.* Impact of age and pre-existing influenza immune responses in humans  
657 receiving split inactivated influenza vaccine on the induction of the breadth of  
658 antibodies to influenza A strains. *Plos One* **12**, e0185666,  
659 doi:10.1371/journal.pone.0185666 PMID - 29091724 (2017).
- 660 66 Khiabani, H., Farrell, G. M., George, K. S. & Rabadan, R. Differences in patient age  
661 distribution between influenza A subtypes. *Plos One* **4**, e6832 (2009).
- 662 67 Gostic, K. M. *et al.* Childhood immune imprinting to influenza A shapes birth year-  
663 specific risk during seasonal H1N1 and H3N2 epidemics. *PLOS Pathogens* **15**, e1008109,  
664 doi:10.1371/journal.ppat.1008109 PMID - 31856206 (2019).
- 665 68 Dunning, A. J. *et al.* Correlates of Protection against Influenza in the Elderly: Results  
666 from an Influenza Vaccine Efficacy Trial. *Clin Vaccine Immunol* **23**, 228-235,  
667 doi:10.1128/cvi.00604-15 PMID - 26762363 (2016).
- 668 69 Shapiro, J. R., Klein, S. L. & Morgan, R. COVID-19: use intersectional analyses to close  
669 gaps in outcomes and vaccination. *Nature* **591**, 202 (2021).
- 670 70 Greenberg, D. P. *et al.* Safety and immunogenicity of a quadrivalent inactivated  
671 influenza vaccine compared to licensed trivalent inactivated influenza vaccines in adults.  
672 *Vaccine* **31**, 770-776 (2013).
- 673 71 Newson, R. B. Sensible parameters for univariate and multivariate splines. *The Stata*  
674 *Journal* **12**, 479-504 (2012).
- 675

676 **Figure Legends**

677 **Figure 1. Study design**

678 Study procedures and the three strains included in each seasonal HD-IIV3 are shown. Serum  
679 from blood draws was used to evaluate pre- and post-vaccination strain-specific  
680 hemagglutination antibody inhibition (HAI) titers, and frailty was assessed using the Frailty  
681 Phenotype.

682

683 **Figure 2. Relationship of age, frailty status, and BMI with post-vaccination hemagglutination  
684 antibody inhibition (HAI) titers outcomes**

685 The relationship of age (in decades, Age/10), frailty status, and BMI (five-unit intervals, BMI/5)  
686 with log<sub>2</sub>-transformed post-vaccination titers are shown as slopes for HAI titers against H1N1  
687 (a), H3N2 (b) and influenza B (c). The relationships of these host factors with log<sub>10</sub>-transformed  
688 fold-rise in titers (post-titer/pre-titer) are shown as slopes for H1N1 (d), H3N2 (e) and influenza  
689 B (f). Their relationships with log odds of seroconversion are shown for H1N1 (g), H3N2 (h) and  
690 influenza B (i). Estimates and 95% confidence intervals were derived from multi-level mixed  
691 effects models with random intercepts on the individual participant. Models controlled for  
692 study year and pre-vaccination HAI titers, and either controlled for sex (whole population  
693 estimates) or used interaction terms between sex and the host factor of interest to derive sex-  
694 specific estimates.

695

696 **Figure 3. Relationship of repeat annual vaccination with post-vaccination hemagglutination  
697 antibody inhibition (HAI) titer outcomes**

698 The relationship between increasing years of vaccination and  $\log_2$ -transformed post-vaccination  
699 HAI titers are shown for each vaccine antigen (**a-c**), with slopes summarized (**d**). Similarly, the  
700 relationship between increasing years of vaccination and the  $\log_{10}$ -transformed fold-rise in  
701 titers are shown for H1N1, H3N2, and influenza B (**e-g**), with the slopes summarized (**h**). The  
702 relationship between increasing years of vaccination and probability of seroconversion are  
703 shown for antibody responses against H1N1, H3N2, and influenza B, respectively (**i-k**), with the  
704 logs odds ratios summarized (**l**). All models controlled for study year, pre-vaccination titers, and  
705 age at vaccination. Whole-population models controlled for sex, while sex-specific estimates  
706 were derived from models including an interaction term between sex and years of participation  
707 and are shown with 95% confidence intervals. Asterisks indicate significant sex differences.

708

709 **Figure 4. Relationship between pre-vaccination hemagglutination antibody inhibition (HAI)**  
710 **titers and post-vaccination HAI titer outcomes**

711 Relationships between  $\log_2$ -transformed pre-vaccination HAI titers and  $\log_2$ -transformed post-  
712 vaccination titers are shown for responses to H1N1, H3N2, and influenza B, respectively (**a-c**),  
713 with slopes summarized (**d**). The relationships between pre-vaccination HAI titers and the  $\log_{10}$ -  
714 transformed fold-rise in titers are shown for each vaccine antigen (**e-g**), with the slopes  
715 summarized (**h**). The relationships between pre-vaccination HAI titers and the probability of  
716 seroconversion are shown for H1N1, H3N2, and influenza B, respectively (**i-k**), with the log odds  
717 ratios summarized (**l**). All models controlled for study year. Overall estimates controlled for sex,  
718 while sex-specific estimates were derived from models that included an interaction term  
719 between sex and pre-vaccination titers and are shown with 95% confidence intervals.

720

721 **Figure 5. Relationship of age, frailty status, and BMI to pre-vaccination hemagglutination**  
722 **antibody inhibition (HAI) titers**

723 Estimates for the relationship of age in decades (Age/10), frailty status, and BMI (five-unit

724 intervals, BMI/5) to pre-vaccination HAI titers were derived from multilevel mixed-effects

725 models controlling for study year for H1N1 (a), H3N2 (b), and influenza B (c). Expanded age

726 models controlling for frailty and BMI are shown for responses to H1N1 (d), H3N2 (e), and

727 influenza B (f). Expanded models for responses to H1N1 (g), H3N2 (h), and influenza B (i) were

728 then amended to include cubic B-splines for age with knots at 5-year intervals. Models for the

729 whole study population adjusted for sex, while sex-specific estimates included an interaction

730 term allowing effects to differ by sex and are shown with 95% confidence intervals. Asterisks

731 indicate significant sex differences.

732

733 **Tables**

734 **Table 1. Summary of study population characteristics**

|                                             | <b>All</b>         | <b>Male</b>        | <b>Female</b>      |
|---------------------------------------------|--------------------|--------------------|--------------------|
| <b>Person-seasons - n (%)</b>               | 433                | 192 (44.3)         | 241 (55.7)         |
| <b>Individuals - n (%)</b>                  | 90                 | 40 (44.4)          | 50 (55.6)          |
| <b>Yearly participation - n (%)</b>         |                    |                    |                    |
| 2014                                        | 45 (50.0)          | 19 (47.5)          | 26 (52.0)          |
| 2015                                        | 68 (75.6)          | 28 (70.0)          | 40 (80.0)          |
| 2016                                        | 68 (75.6)          | 31 (77.5)          | 37 (74.0)          |
| 2017                                        | 87 (96.7)          | 38 (95.0)          | 49 (98.0)          |
| 2018                                        | 88 (97.8)          | 40 (100.0)         | 48 (96.0)          |
| 2019                                        | 77 (85.6)          | 36 (90.0)          | 41 (82.0)          |
| <b>Number of years participated</b>         |                    |                    |                    |
| 4                                           | 40 (44.4)          | 18 (45.0)          | 22 (44.0)          |
| 5                                           | 27 (30.0)          | 12 (30.0)          | 15 (30.0)          |
| 6                                           | 23 (25.6)          | 10 (25.0)          | 13 (26.0)          |
| <b>Birth year - Median (p25-p75)</b>        | 1934 (1930 - 1938) | 1934 (1929 - 1938) | 1934 (1930 - 1938) |
| Range                                       | 1916 - 1941        | 1922 - 1941        | 1916 - 1940        |
| <b>Baseline characteristics<sup>a</sup></b> |                    |                    |                    |
| Age - Median (p25-p75)                      | 80 (77 - 83)       | 80 (77 - 84)       | 80 (77 - 83)       |
| Frailty - n (%)                             |                    |                    |                    |
| Non-frail                                   | 37 (41.1)          | 17 (42.5)          | 20 (40.0)          |
| Pre-frail                                   | 48 (53.3)          | 21 (52.5)          | 27 (54.0)          |
| Frail                                       | 5 (5.6)            | 2 (5.0)            | 3 (6.0)            |
| BMI - Median (p25-p75)                      | 26.8 (24.5 - 30.4) | 27.0 (25.3 - 29.6) | 26.5 (23.2 - 30.5) |
| <b>Change from baseline<sup>b</sup></b>     |                    |                    |                    |
| Frailty - n (%)                             |                    |                    |                    |
| Improved                                    | 11 (12.2)          | 8 (20.0)           | 3 (6.0)            |
| No change                                   | 44 (48.9)          | 18 (45.0)          | 26 (52.0)          |
| Worsened                                    | 35 (38.9)          | 14 (35.0)          | 21 (42.0)          |
| BMI                                         |                    |                    |                    |
| Decreased                                   | 39 (43.3)          | 19 (47.5)          | 20 (40.0)          |
| No change (+/- 1)                           | 38 (42.2)          | 14 (35.0)          | 24 (48.0)          |
| Increased                                   | 13 (14.4)          | 7 (17.5)           | 6 (12.0)           |

<sup>a</sup> Value for first year participated

<sup>b</sup> Difference between first and last year participated

736 **Table 2. Pre- and post-vaccination hemagglutination antibody inhibition (HAI) titer outcomes**

|                                   | All                   | Males                 | Females               | Sex difference* |
|-----------------------------------|-----------------------|-----------------------|-----------------------|-----------------|
| <b>Person-seasons - n (%)</b>     | 433                   | 192 (44.3)            | 241 (55.7)            |                 |
| <b>H1N1</b>                       |                       |                       |                       |                 |
| Pre-vaccination - GMT (95% CI)    | 74.3 (66.8 - 82.8)    | 81.7 (70.7 - 94.4)    | 69.0 (59.0 - 80.6)    | 0.4451          |
| Post-vaccination - GMT (95% CI)   | 192.3 (174.6 - 211.9) | 185.9 (161.5 - 213.9) | 197.7 (173.0 - 225.9) | 0.8922          |
| Pre-vaccination SPR - n (%)       | 325 (75.1)            | 149 (77.6)            | 176 (73.0)            | 0.4116          |
| Post-vaccination SPR - n (%)      | 415 (95.8)            | 184 (95.8)            | 231 (95.9)            | 0.7837          |
| Fold-rise (log10) - mean (95% CI) | 0.413 (0.376 - 0.450) | 0.357 (0.308 - 0.406) | 0.457 (0.405 - 0.510) | 0.1711          |
| Seroconversion rate - n (%)       | 134 (30.9)            | 47 (24.5)             | 87 (36.1)             | 0.1932          |
| <b>H3N2</b>                       |                       |                       |                       |                 |
| Pre-vaccination - GMT (95% CI)    | 89.3 (77.0 - 103.5)   | 91.8 (73.0 - 115.4)   | 87.3 (71.9 - 106.0)   | 0.8246          |
| Post-vaccination - GMT (95% CI)   | 363.1 (316.3 - 416.8) | 365.0 (292.3 - 455.9) | 361.5 (303.5 - 430.6) | 0.8793          |
| Pre-vaccination SPR - n (%)       | 314 (72.5)            | 141 (73.4)            | 173 (71.8)            | 0.8855          |
| Post-vaccination SPR - n (%)      | 408 (94.2)            | 179 (93.2)            | 229 (95.0)            | 0.4556          |
| Fold-rise (log10) - mean (95% CI) | 0.609 (0.559 - 0.660) | 0.600 (0.527 - 0.672) | 0.617 (0.548 - 0.687) | 0.8554          |
| Seroconversion rate - n (%)       | 207 (47.8)            | 84 (43.8)             | 123 (51.0)            | 0.1807          |
| <b>B</b>                          |                       |                       |                       |                 |
| Pre-vaccination - GMT (95% CI)    | 262.8 (235.3 - 293.4) | 236.3 (204.8 - 272.6) | 286.0 (243.1 - 336.4) | 0.2847          |
| Post-vaccination - GMT (95% CI)   | 571.1 (520.2 - 627.1) | 508.5 (445.8 - 580.1) | 626.5 (549.7 - 714.0) | 0.1735          |
| Pre-vaccination SPR - n (%)       | 424 (97.9)            | 191 (99.5)            | 233 (96.7)            | 0.2887          |
| Post-vaccination SPR - n (%)      | 433 (100.0)           | 192 (100.0)           | 241 (100.0)           | 0.2887          |
| Fold-rise (log10) - mean (95% CI) | 0.337 (0.304 - 0.370) | 0.333 (0.288 - 0.378) | 0.341 (0.294 - 0.387) | 0.9482          |
| Seroconversion rate - n (%)       | 105 (24.2)            | 47 (24.5)             | 58 (24.1)             | 0.8386          |

737 \* Sex difference p-values derived from multi-level linear (GMT) or logistic regressions (SPR and SCR). Fixed effects included a term for sex and  
 738 controlled for study year. Random effects included a random intercept on the individual.

739 **Abbreviations & definitions:** CI: confidence interval; Fold-rise: post-vaccination titer divided by pre-vaccination titer, transformed on the log<sub>10</sub>  
 740 scale; GMT: geometric mean titer; SPR: seroprotection rate, the proportion of individuals who achieved a titer ≥40; Seroconversion rate: the  
 741 proportion of individuals who achieved a fold-rise in titer ≥ 4.

742 **Table 3. Sex-specific effects of age on pre-vaccination hemagglutination antibody inhibition (HAI) titers**

|             | Base Models <sup>a</sup> |              |                    |              |                             |              | Expanded Models <sup>b</sup> |              |                    |              |                             |              |
|-------------|--------------------------|--------------|--------------------|--------------|-----------------------------|--------------|------------------------------|--------------|--------------------|--------------|-----------------------------|--------------|
|             | Male age effects         |              | Female age effects |              | Sex difference <sup>c</sup> |              | Male age effects             |              | Female age effects |              | Sex difference <sup>c</sup> |              |
|             | Change                   | p-value      | Change             | p-value      | Difference                  | p-value      | Change                       | p-value      | Change             | p-value      | Difference                  | p-value      |
| <b>H1N1</b> |                          |              |                    |              |                             |              |                              |              |                    |              |                             |              |
| Linear      | 0.047                    | 0.164        | 0.034              | 0.286        | -0.014                      | 0.674        | 0.049                        | 0.152        | 0.035              | 0.267        | -0.014                      | 0.676        |
| Non-linear  |                          |              |                    |              |                             |              |                              |              |                    |              |                             |              |
| 75-80       | 0.379                    | 0.300        | 0.146              | 0.650        | -0.023                      | 0.963        | 0.383                        | 0.301        | 0.134              | 0.685        | -0.010                      | 0.984        |
| 80-85       | 0.133                    | 0.564        | 0.233              | 0.251        | -0.256                      | 0.465        | 0.131                        | 0.574        | 0.243              | 0.238        | -0.259                      | 0.462        |
| 85-90       | 0.205                    | 0.397        | 0.109              | 0.589        | -0.156                      | 0.657        | 0.220                        | 0.377        | 0.113              | 0.593        | -0.147                      | 0.678        |
| 90-95       | 0.421                    | 0.188        | 0.066              | 0.830        | -0.253                      | 0.547        | 0.430                        | 0.186        | 0.071              | 0.817        | -0.254                      | 0.553        |
| 95          |                          |              |                    |              | -0.609                      | 0.31         |                              |              |                    |              | -0.612                      | 0.313        |
| <b>H3N2</b> |                          |              |                    |              |                             |              |                              |              |                    |              |                             |              |
| Linear      | -0.067                   | 0.133        | 0.065              | 0.103        | <b>0.131</b>                | <b>0.014</b> | -0.075                       | 0.097        | 0.062              | 0.121        | <b>0.137</b>                | <b>0.010</b> |
| Non-linear  |                          |              |                    |              |                             |              |                              |              |                    |              |                             |              |
| 75-80       | <b>-1.725</b>            | <b>0.015</b> | -0.156             | 0.801        | <b>-1.898</b>               | <b>0.029</b> | <b>-1.776</b>                | <b>0.012</b> | -0.297             | 0.637        | <b>-1.833</b>               | <b>0.036</b> |
| 80-85       | -0.139                   | 0.711        | <b>0.653</b>       | <b>0.039</b> | -0.328                      | 0.469        | -0.102                       | 0.786        | <b>0.670</b>       | <b>0.037</b> | -0.355                      | 0.435        |
| 85-90       | 0.023                    | 0.953        | 0.114              | 0.716        | 0.463                       | 0.326        | -0.048                       | 0.904        | 0.149              | 0.651        | 0.417                       | 0.379        |
| 90-95       | -0.496                   | 0.39         | -0.415             | 0.430        | 0.553                       | 0.351        | -0.591                       | 0.307        | -0.421             | 0.431        | 0.614                       | 0.308        |
| 95          |                          |              |                    |              | 0.634                       | 0.503        |                              |              |                    |              | 0.784                       | 0.412        |
| <b>B</b>    |                          |              |                    |              |                             |              |                              |              |                    |              |                             |              |
| Linear      | <b>-0.098</b>            | <b>0.005</b> | 0.009              | 0.762        | <b>0.108</b>                | <b>0.007</b> | <b>-0.078</b>                | <b>0.023</b> | 0.033              | 0.275        | <b>0.111</b>                | <b>0.005</b> |
| Non-linear  |                          |              |                    |              |                             |              |                              |              |                    |              |                             |              |
| 75-80       | -0.315                   | 0.516        | <b>0.965</b>       | <b>0.023</b> | -1.051                      | 0.087        | -0.189                       | 0.693        | <b>1.203</b>       | <b>0.004</b> | -1.048                      | 0.080        |
| 80-85       | -0.106                   | 0.695        | 0.161              | 0.486        | 0.229                       | 0.511        | 0.038                        | 0.886        | 0.219              | 0.330        | 0.344                       | 0.298        |
| 85-90       | -0.291                   | 0.306        | <b>-0.534</b>      | <b>0.019</b> | 0.496                       | 0.165        | -0.181                       | 0.515        | -0.111             | 0.633        | 0.525                       | 0.123        |
| 90-95       | <b>-1.799</b>            | <b>0.000</b> | -0.434             | 0.248        | 0.253                       | 0.572        | <b>-1.649</b>                | <b>0.000</b> | -0.233             | 0.526        | 0.595                       | 0.168        |
| 95          |                          |              |                    |              | <b>1.618</b>                | <b>0.020</b> |                              |              |                    |              | <b>2.011</b>                | <b>0.003</b> |

743 <sup>a</sup> Base models controlled for study year.744 <sup>b</sup> Expanded models controlled for study year, frailty, and BMI.745 <sup>c</sup> For linear models, the sex-difference is the age-sex interaction term. For non-linear models, the sex difference is at the beginning of each five-year interval.

746 Non-linear models include cubic B-splines with knots at 5-year age intervals from 75-95 years.

747 Statistically significant values are bolded.



748 **Table 4. Goodness-of-fit comparison of pre-vaccination age models**

| Age-sex interaction | Base models <sup>a</sup> |         | Expanded models <sup>b</sup> |                |
|---------------------|--------------------------|---------|------------------------------|----------------|
|                     | -                        | +       | -                            | +              |
| <b>H1N1</b>         |                          |         |                              |                |
| Linear age          | 1138.86                  | 1140.69 | <b>1131.05</b>               | 1132.87        |
| Non-linear age      | 1144.47                  | 1151.51 | 1136.73                      | 1143.72        |
| <b>H3N2</b>         |                          |         |                              |                |
| Linear age          | 1693.38                  | 1689.57 | 1666.94                      | <b>1662.83</b> |
| Non-linear age      | 1694.58                  | 1694.83 | 1667.28                      | 1667.95        |
| <b>B</b>            |                          |         |                              |                |
| Linear age          | 1398.31                  | 1393.17 | 1355.04                      | 1349.28        |
| Non-linear age      | 1388.09                  | 1378.85 | 1344.94                      | <b>1337.26</b> |

749 <sup>a</sup> Base models controlled for study year.

750 <sup>b</sup> Expanded models controlled for study year, frailty, and BMI.

751 The lowest AIC, corresponding to the best-fit model, is bolded for each virus.

752

753

# Figure 1: Study design

|  <ul style="list-style-type: none"> <li>Community-dwelling older adults</li> <li>Age at vaccination: 75+</li> <li>Study participation: 4+ years</li> </ul> |                                     | 2014                                                                              |                                                                                   | 2015                                                                              |                                                                                   | 2016                                                                              |                                                                                   | 2017                                                                                |                                                                                     | 2018                                                                                |                                                                                     | 2019                                                                                |                                                                                     |
|---------------------------------------------------------------------------------------------------------------------------------------------------------------------------------------------------------------------------------------------|-------------------------------------|-----------------------------------------------------------------------------------|-----------------------------------------------------------------------------------|-----------------------------------------------------------------------------------|-----------------------------------------------------------------------------------|-----------------------------------------------------------------------------------|-----------------------------------------------------------------------------------|-------------------------------------------------------------------------------------|-------------------------------------------------------------------------------------|-------------------------------------------------------------------------------------|-------------------------------------------------------------------------------------|-------------------------------------------------------------------------------------|-------------------------------------------------------------------------------------|
|                                                                                                                                                                                                                                             |                                     | D0                                                                                | D28                                                                               | D0                                                                                | D28                                                                               | D0                                                                                | D28                                                                               | D0                                                                                  | D28                                                                                 | D0                                                                                  | D28                                                                                 | D0                                                                                  | D28                                                                                 |
|                                                                                                                                                                                                                                             |                                     |  |  |  |  |  |  |  |  |  |  |  |  |
| <b>H1N1</b>                                                                                                                                                                                                                                 | A/California/7/2009                 | █                                                                                 | █                                                                                 | █                                                                                 | █                                                                                 | █                                                                                 | █                                                                                 |                                                                                     |                                                                                     |                                                                                     |                                                                                     |                                                                                     |                                                                                     |
|                                                                                                                                                                                                                                             | A/Michigan/45/2015                  |                                                                                   |                                                                                   |                                                                                   |                                                                                   |                                                                                   |                                                                                   | █                                                                                   | █                                                                                   | █                                                                                   | █                                                                                   |                                                                                     |                                                                                     |
|                                                                                                                                                                                                                                             | A/Brisbane/02/2018                  |                                                                                   |                                                                                   |                                                                                   |                                                                                   |                                                                                   |                                                                                   |                                                                                     |                                                                                     |                                                                                     |                                                                                     | █                                                                                   | █                                                                                   |
| <b>H3N2</b>                                                                                                                                                                                                                                 | A/Texas/50/2012                     | █                                                                                 | █                                                                                 |                                                                                   |                                                                                   |                                                                                   |                                                                                   |                                                                                     |                                                                                     |                                                                                     |                                                                                     |                                                                                     |                                                                                     |
|                                                                                                                                                                                                                                             | A/Switzerland/9715293/2013          |                                                                                   |                                                                                   | █                                                                                 | █                                                                                 |                                                                                   |                                                                                   |                                                                                     |                                                                                     |                                                                                     |                                                                                     |                                                                                     |                                                                                     |
|                                                                                                                                                                                                                                             | A/Hong Kong/4801/2014               |                                                                                   |                                                                                   |                                                                                   |                                                                                   | █                                                                                 | █                                                                                 | █                                                                                   | █                                                                                   |                                                                                     |                                                                                     |                                                                                     |                                                                                     |
|                                                                                                                                                                                                                                             | A/Singapore/INFIMH-16-0019/2016     |                                                                                   |                                                                                   |                                                                                   |                                                                                   |                                                                                   |                                                                                   |                                                                                     |                                                                                     | █                                                                                   | █                                                                                   |                                                                                     |                                                                                     |
|                                                                                                                                                                                                                                             | A/Kansas/14/2017                    |                                                                                   |                                                                                   |                                                                                   |                                                                                   |                                                                                   |                                                                                   |                                                                                     |                                                                                     |                                                                                     |                                                                                     | █                                                                                   | █                                                                                   |
| <b>IBV</b>                                                                                                                                                                                                                                  | B/Massachusetts/2/2012 (Yam)        | █                                                                                 | █                                                                                 |                                                                                   |                                                                                   |                                                                                   |                                                                                   |                                                                                     |                                                                                     |                                                                                     |                                                                                     |                                                                                     |                                                                                     |
|                                                                                                                                                                                                                                             | B/Phuket/3073/2013 (Yam)            |                                                                                   |                                                                                   | █                                                                                 | █                                                                                 |                                                                                   |                                                                                   |                                                                                     |                                                                                     |                                                                                     |                                                                                     |                                                                                     |                                                                                     |
|                                                                                                                                                                                                                                             | B/Brisbane/60/2008-like virus (Vic) |                                                                                   |                                                                                   |                                                                                   |                                                                                   | █                                                                                 | █                                                                                 | █                                                                                   | █                                                                                   |                                                                                     |                                                                                     |                                                                                     |                                                                                     |
|                                                                                                                                                                                                                                             | B/Maryland/15/2016 BX-69A (Vic)     |                                                                                   |                                                                                   |                                                                                   |                                                                                   |                                                                                   |                                                                                   |                                                                                     |                                                                                     | █                                                                                   | █                                                                                   | █                                                                                   | █                                                                                   |

 Blood draw

 Frailty & vital signs assessment

 High-dose trivalent inactivated influenza vaccine

**Fig 2. Relationship of age, frailty status, and BMI to post-vaccination HAI titers outcomes**

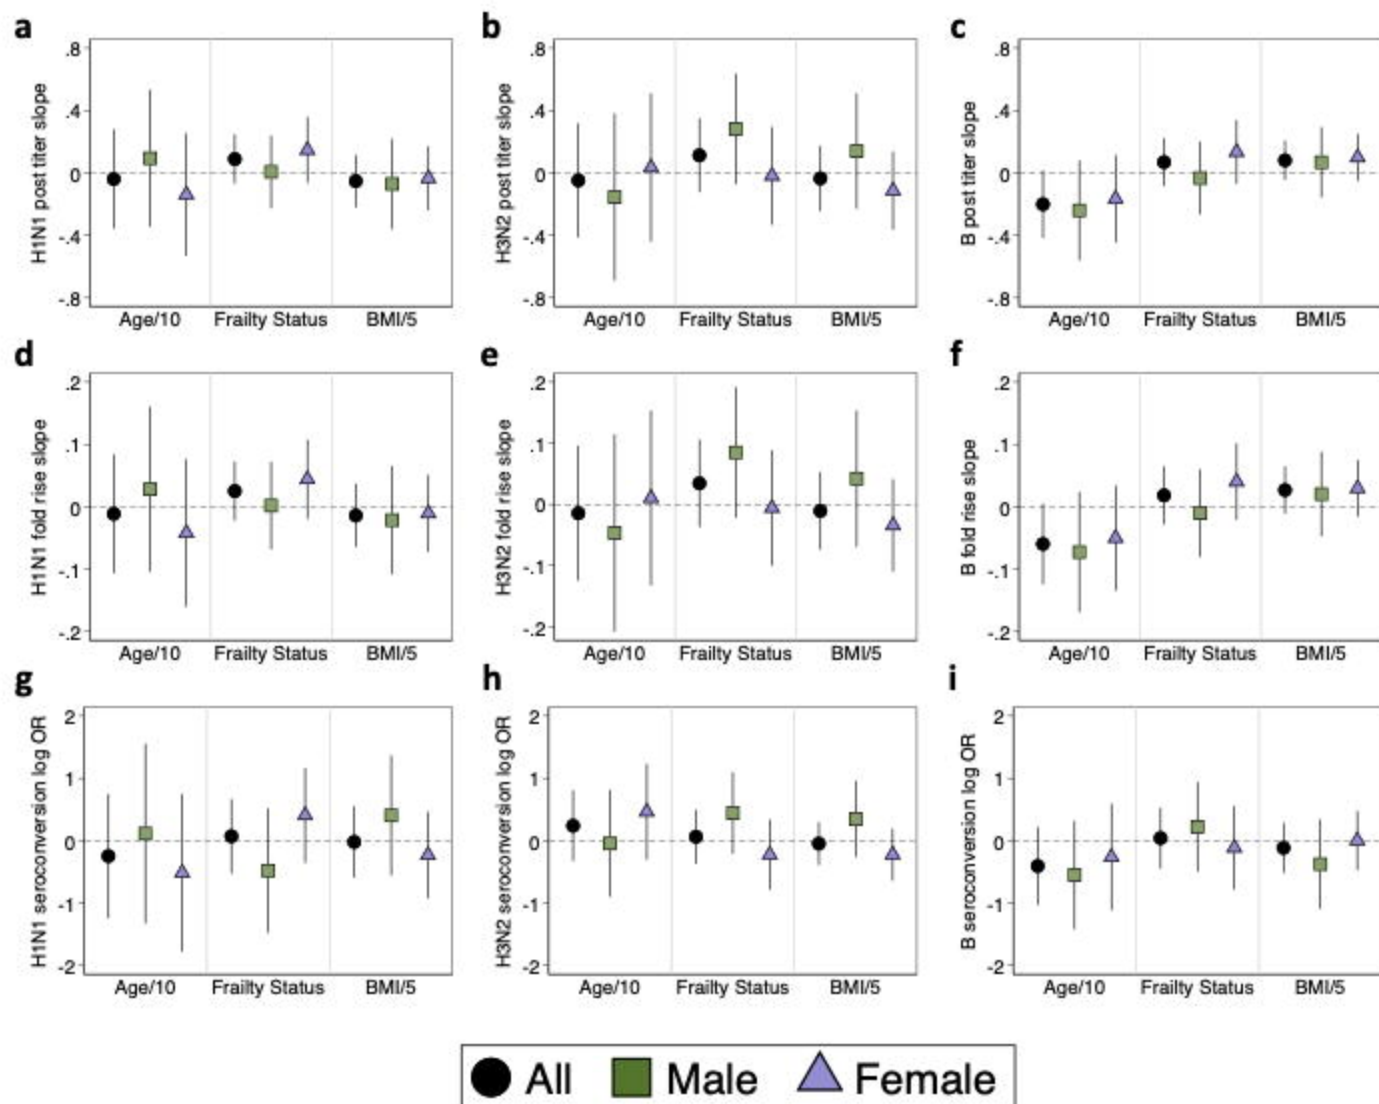

**Fig 3: Relationship of repeat annual vaccination to post-vaccination HAI titer outcomes**

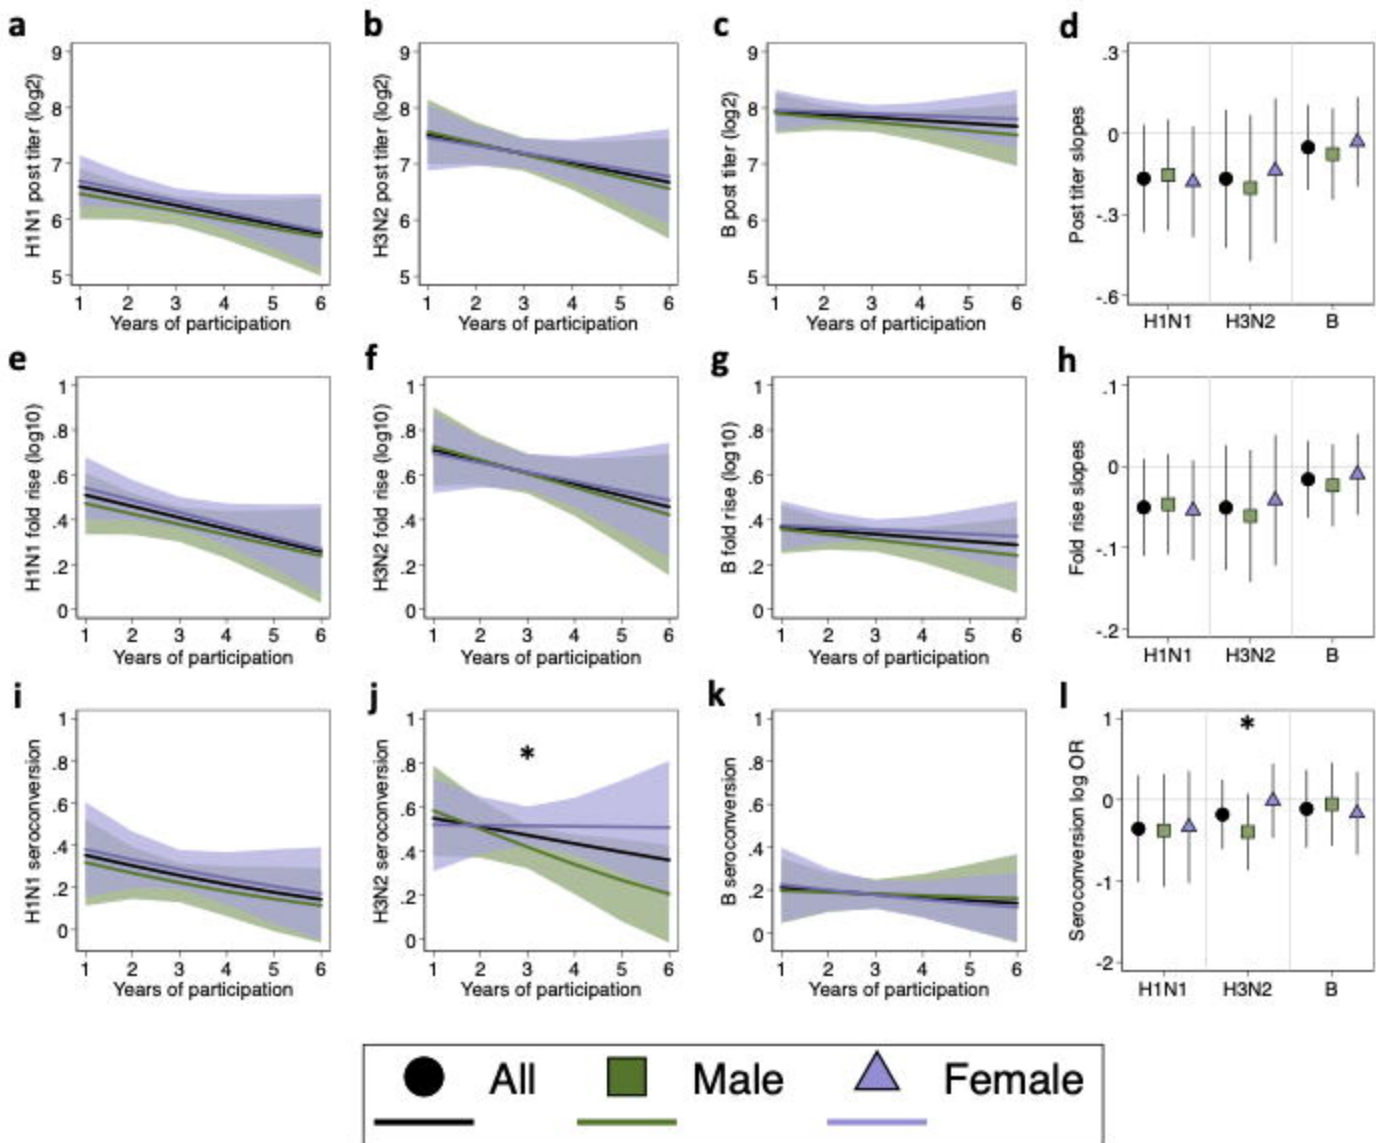

**Fig 4. Relationship between pre-vaccination HAI titers and post-vaccination HAI titer outcomes**

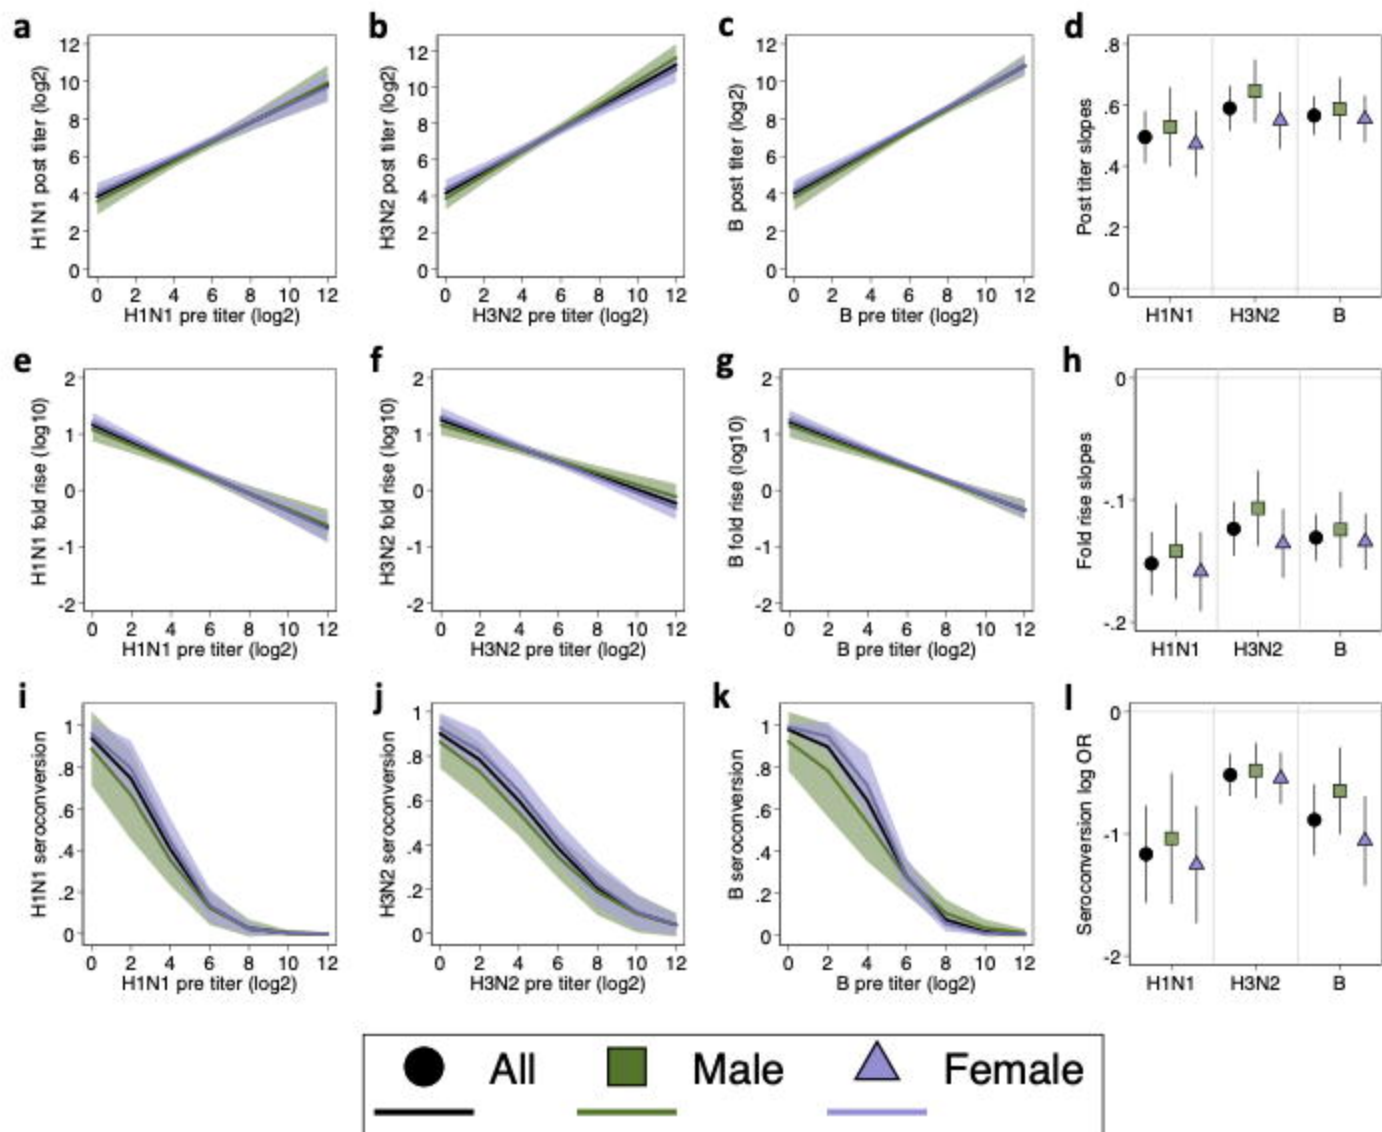

**Fig 5. Relationship of age, frailty status, and BMI to pre-vaccination HAI titers**

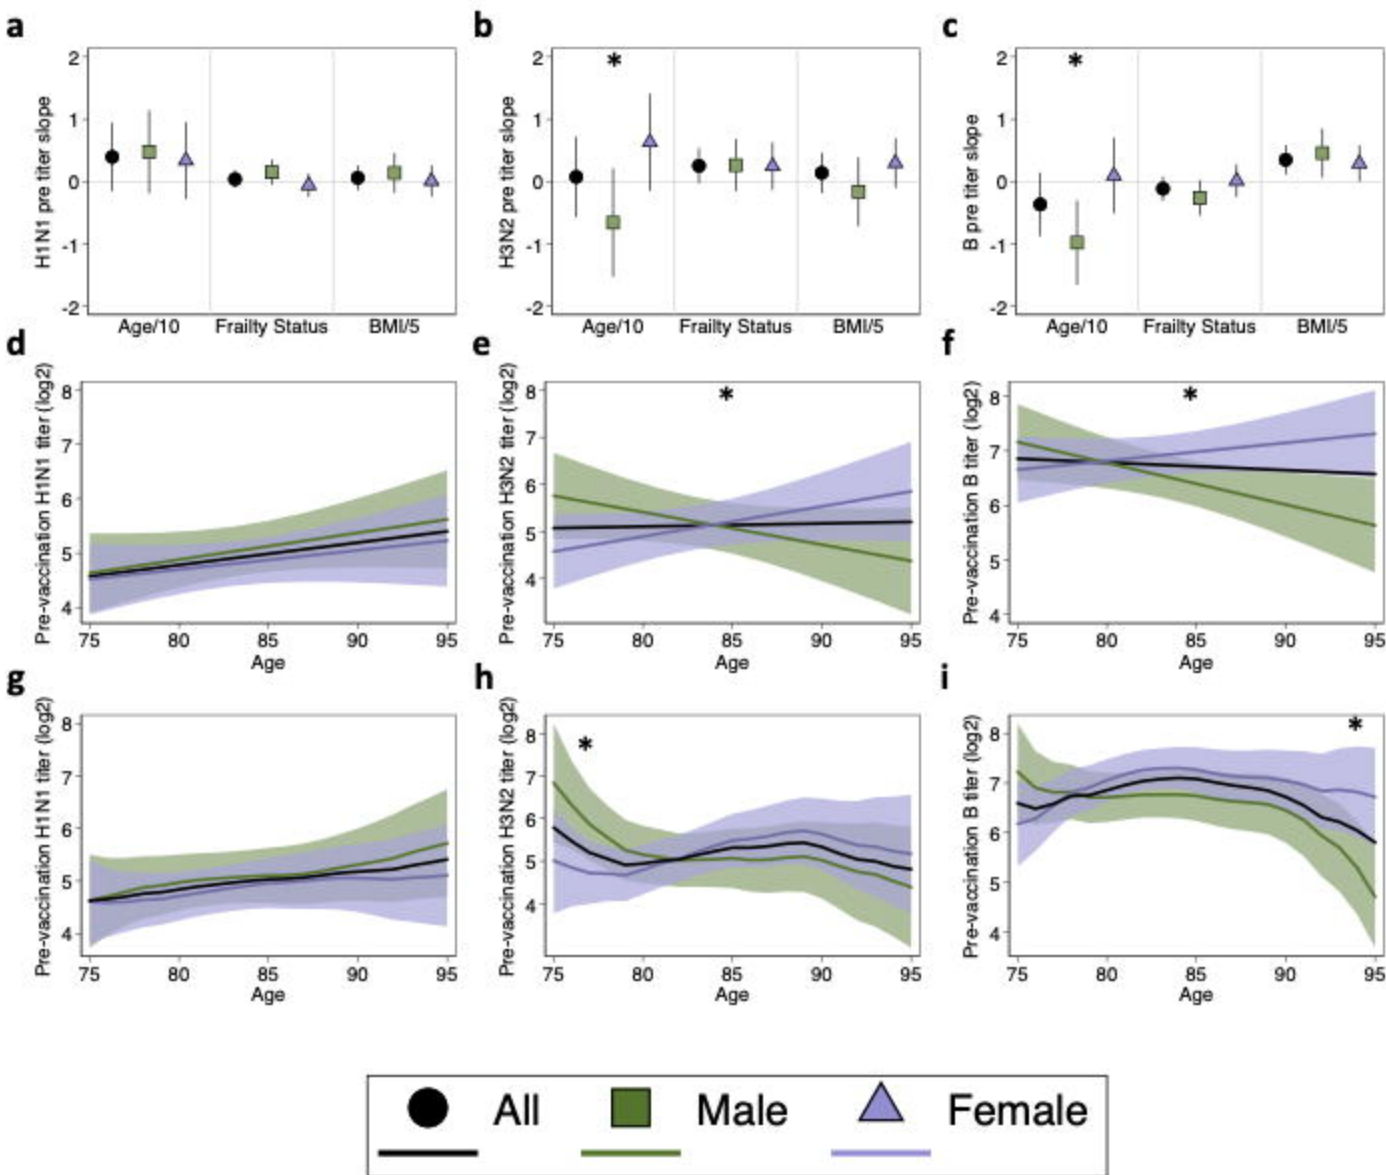

Source: http://medrxiv.org/content/10.1101/2021.07.21.21260712v1.full.pdf
